# Supplementary material for: Accuracy and usability of a diagnostic decision support system in the diagnosis of three representative rheumatic diseases: a randomized controlled trial among medical students
Source: PubMed Central journal article supplement (PMC8420018; doi:10.1186/s13075-021-02616-6), 2021-09-06
Supplement: 13075_2021_2616_MOESM5_ESM.pdf [file 13075_2021_2616_MOESM5_ESM.pdf]

| Participant number                             | 1                                           | 2 | 3 | 4 | 5 | 6 | 7 | 8 | 9 | 10 | 11 | 12 | 13 | 14 | 15 | 16 | 17 | 18 | 19 | 20 | 21 | 22 | 23 | 24 | 25 | 26 | 27 | 28 | 29 | 30 | 31 | 32 | 33 | 34 |   |   |
|------------------------------------------------|---------------------------------------------|---|---|---|---|---|---|---|---|----|----|----|----|----|----|----|----|----|----|----|----|----|----|----|----|----|----|----|----|----|----|----|----|----|---|---|
| Top diagnosis                                  | 1                                           | 2 | 2 | 1 | 1 | 2 | 1 | 1 | 4 | 1  | 2  | 2  | 1  | 1  | 4  | 2  | 2  | 1  | 2  | 2  | 1  | 2  | 4  | 2  | 2  | 1  | 1  | 1  | 1  | 2  | 1  | 5  | 2  | 3  |   |   |
| Present symptoms entered and their entry order | Pain in more than one joint                 | 4 | 6 | 5 | 1 | 1 | 3 | 5 | 5 | 2  | 6  | 5  | 5  | 2  | 1  | 1  | 6  | 4  | 6  | 6  | 4  | 5  | x  | 4  | 7  | 5  | 3  | 3  | 7  | 2  | 8  | 1  | x  | 5  | 4 |   |
|                                                | Morning stiffness                           | 1 | 3 | 2 | 3 | 4 | 4 | x | 4 | 4  | 4  | 3  | 4  | 1  | 3  | 3  | 4  | 2  | 4  | 4  | 3  | 3  | 6  | 2  | 6  | 4  | 2  | 2  | 5  | 3  | 6  | 3  | 3  | 4  | 3 |   |
|                                                | Hand pain                                   | x | x | 9 | x | x | x | 1 | 2 | x  | x  | 1  | 3  | x  | 5  | 5  | 1  | x  | 1  | x  | x  | x  | x  | x  | x  | x  | 6  | 1  | x  | 1  | x  | x  | x  | x  | x |   |
|                                                | Reduced flexibility in one's fingers        | x | 1 | x | 5 | 2 | 2 | 2 | 1 | x  | 1  | 2  | x  | 5  | x  | x  | 2  | x  | 3  | 2  | x  | 1  | 3  | x  | 3  | x  | 1  | x  | x  | 1  | 2  | x  | 1  | x  | x |   |
|                                                | Joint pain in fingers                       | x | 5 | 1 | 4 | 5 | x | 4 | x | x  | x  | 4  | x  | 4  | x  | 4  | 5  | 3  | 5  | 5  | 1  | 4  | 2  | 5  | 1  | 6  | 5  | x  | 6  | 4  | 7  | 5  | x  | 7  | 5 |   |
|                                                | Wrist pain                                  | 2 | x | x | x | x | 1 | x | x | x  | 2  | x  | x  | x  | x  | x  | x  | x  | x  | x  | x  | x  | 1  | 1  | 2  | 1  | x  | 1  | x  | x  | x  | x  | x  | 2  | 2 |   |
|                                                | Reduced flexibility in the wrists           | x | x | 4 | x | x | x | x | x | x  | x  | 1  | x  | x  | x  | x  | x  | x  | x  | x  | x  | x  | 4  | x  | 4  | x  | x  | x  | 2  | x  | 3  | x  | x  | x  | x |   |
|                                                | Reduced flexibility in multiple joints      | 5 | x | 3 | x | x | x | x | 1 | x  | x  | x  | x  | x  | x  | x  | x  | x  | x  | x  | x  | x  | x  | x  | x  | x  | x  | 4  | x  | x  | x  | 4  | x  | x  | x |   |
|                                                | Fatigue                                     | 3 | 2 | x | 2 | 3 | x | 3 | 3 | 3  | 3  | x  | 2  | 3  | 2  | 2  | 3  | 6  | 2  | 3  | 2  | 2  | 5  | 3  | 5  | 3  | 4  | 5  | 3  | 5  | 5  | 2  | 2  | 3  | x |   |
|                                                | Painful finger joints when pressure applied | 6 | 4 | 6 | x | 6 | x | 6 | x | x  | 5  | x  | x  | x  | x  | x  | x  | 5  | x  | x  | 5  | x  | x  | x  | x  | x  | x  | 7  | x  | x  | 9  | x  | 4  | 6  | x |   |
|                                                | Finger pain                                 | x | x | x | x | x | x | x | x | x  | x  | x  | x  | x  | x  | x  | x  | x  | x  | 1  | x  | x  | x  | x  | x  | 2  | x  | x  | 4  | x  | 4  | x  | x  | 1  | 1 |   |
|                                                | Swollen finger joint                        | x | x | 7 | x | 7 | x | x | x | x  | 7  | x  | x  | x  | x  | x  | x  | x  | x  | x  | 6  | x  | x  | x  | x  | x  | x  | x  | x  | x  | x  | x  | x  | x  | x | x |
|                                                | Recurring respiratory tract infection       | x | x | 8 | x | x | x | x | x | x  | x  | x  | x  | x  | x  | x  | x  | x  | x  | x  | x  | x  | x  | x  | x  | x  | x  | x  | x  | x  | x  | x  | x  | x  | x | x |
| General muscle pain                            | x                                           | x | x | x | x | x | x | x | x | x  | x  | x  | x  | 4  | x  | x  | x  | x  | x  | x  | x  | x  | x  | x  | x  | x  | x  | x  | x  | x  | x  | x  | x  | x  | x |   |
| Arm pain                                       | x                                           | x | x | x | x | x | x | x | x | x  | x  | x  | x  | x  | x  | 1  | x  | x  | x  | x  | x  | x  | x  | x  | x  | x  | x  | x  | x  | x  | x  | x  | x  | x  | x |   |

Top diagnoses 1: Rheumatoid arthritis, 2: Felty's syndrome, 3: Osteoarthritis, 4: Fibromyalgia, 5: Snapping finger
